# Supplementary material for: Efficacy of Probiotics Compared to Chlorhexidine Mouthwash in Improving Periodontal Status: A Systematic Review and Meta-Analysis
Source: Hindawi journal article supplement (doi:10.1155/2023/4013004), 2023-01-23
Supplement: f1 [file 4013004.f1.zip]

## Supplementary File- Certain of evidence by GRADE analyze

**Question:** [Probiotic] compared to [Chlorhexidine] for [problem periodontal]

| Certainty assessment |              |              |               |              |             |                      | № of patients |                 | Effect            |                   | Certainty | Importance |
|----------------------|--------------|--------------|---------------|--------------|-------------|----------------------|---------------|-----------------|-------------------|-------------------|-----------|------------|
| № of studies         | Study design | Risk of bias | Inconsistency | Indirectness | Imprecision | Other considerations | [Probiotic]   | [Chlorhexidine] | Relative (95% CI) | Absolute (95% CI) |           |            |

**Gingival index (follow-up: range 1 weeks to 4 weeks)**

|    |                   |             |                           |             |                      |      |     |     |   |                                              |                  |          |
|----|-------------------|-------------|---------------------------|-------------|----------------------|------|-----|-----|---|----------------------------------------------|------------------|----------|
| 10 | randomised trials | not serious | very serious <sup>a</sup> | not serious | serious <sup>b</sup> | none | 160 | 160 | - | MD 0.03 lower<br>(0.09 lower to 0.04 higher) | ⊕○○○<br>Very low | CRITICAL |
|----|-------------------|-------------|---------------------------|-------------|----------------------|------|-----|-----|---|----------------------------------------------|------------------|----------|

**Gingival index outliers removal (follow-up: range 1 weeks to 4 weeks)**

|   |                   |             |                           |             |                      |      |     |     |   |                |                  |          |
|---|-------------------|-------------|---------------------------|-------------|----------------------|------|-----|-----|---|----------------|------------------|----------|
| 8 | randomised trials | not serious | very serious <sup>a</sup> | not serious | serious <sup>b</sup> | none | 120 | 120 | - | 0<br>(0 to 0 ) | ⊕○○○<br>Very low | CRITICAL |
|---|-------------------|-------------|---------------------------|-------------|----------------------|------|-----|-----|---|----------------|------------------|----------|

**Paque index (follow-up: range 1 weeks to 4 weeks)**

|    |                   |             |                           |             |                      |      |     |     |   |                                               |                  |          |
|----|-------------------|-------------|---------------------------|-------------|----------------------|------|-----|-----|---|-----------------------------------------------|------------------|----------|
| 15 | randomised trials | not serious | very serious <sup>a</sup> | not serious | serious <sup>b</sup> | none | 261 | 260 | - | MD 0.11 higher<br>(0.05 lower to 0.28 higher) | ⊕○○○<br>Very low | CRITICAL |
|----|-------------------|-------------|---------------------------|-------------|----------------------|------|-----|-----|---|-----------------------------------------------|------------------|----------|

**Plaque index outliers removal (follow-up: range 1 weeks to 4 weeks)**

|    |                   |             |                           |             |                      |      |     |     |   |                |                  |          |
|----|-------------------|-------------|---------------------------|-------------|----------------------|------|-----|-----|---|----------------|------------------|----------|
| 14 | randomised trials | not serious | very serious <sup>a</sup> | not serious | serious <sup>b</sup> | none | 241 | 240 | - | 0<br>(0 to 0 ) | ⊕○○○<br>Very low | CRITICAL |
|----|-------------------|-------------|---------------------------|-------------|----------------------|------|-----|-----|---|----------------|------------------|----------|

**Oral Hygiene Index outliers removal (follow-up: range 1 weeks to 4 weeks)**

|   |                   |             |             |             |                      |      |    |    |   |                                              |                  |          |
|---|-------------------|-------------|-------------|-------------|----------------------|------|----|----|---|----------------------------------------------|------------------|----------|
| 5 | randomised trials | not serious | not serious | not serious | serious <sup>b</sup> | none | 75 | 75 | - | MD 0.01 lower<br>(0.05 lower to 0.04 higher) | ⊕⊕⊕○<br>Moderate | CRITICAL |
|---|-------------------|-------------|-------------|-------------|----------------------|------|----|----|---|----------------------------------------------|------------------|----------|

**Plaque index (follow-up: 4 weeks)**

|   |                   |             |             |             |                      |      |    |    |   |                                                |                  |          |
|---|-------------------|-------------|-------------|-------------|----------------------|------|----|----|---|------------------------------------------------|------------------|----------|
| 4 | randomised trials | not serious | not serious | not serious | serious <sup>b</sup> | none | 68 | 67 | - | MD 0.16 higher<br>(0.09 higher to 0.23 higher) | ⊕⊕⊕○<br>Moderate | CRITICAL |
|---|-------------------|-------------|-------------|-------------|----------------------|------|----|----|---|------------------------------------------------|------------------|----------|

CI: confidence interval; MD: mean difference

### Explanations

a. There is considerable statistically significant heterogeneity (>75%)

b. Confidence interval crosses null value or includes values favoring either treatment
