# Supplementary material for: Efficacy of Probiotics Compared to Chlorhexidine Mouthwash in Improving Periodontal Status: A Systematic Review and Meta-Analysis
Source: Int J Dent. 2023 Jan 23;2023:4013004. doi: 10.1155/2023/4013004 (PMC9886484; doi:10.1155/2023/4013004)
Supplement: Supplementary Materials — Supplementary Figure 1. Detecting outlier studies for the gingival index. Supplementary Figure 2.Meta-analysis after removing outlier studies for the gingival index. Supplementary Figure 3. Detecting outlier studies for the plaque index. Supplementary Figure 4.Meta-analysis after removing outlier studies for the plaque index. Supplementary Table 1. Databases and search strategy. Supplementary Table 2. GRADE certainty of the evidence. [file 4013004.f1.zip]

Archive with 6 entries (6 files):
- Supplementary figure 1.pdf
- Supplementary figure 2.pdf
- Supplementary figure 3.pdf
- Supplementary figure 4.pdf
- Supplementary Table 1 (2).docx
- Supplementary table 2 (1).pdf
