# Supplementary figures and images for: Efficacy of Probiotics Compared to Chlorhexidine Mouthwash in Improving Periodontal Status: A Systematic Review and Meta-Analysis
Source: Hindawi journal article supplement (doi:10.1155/2023/4013004), 2023-01-23

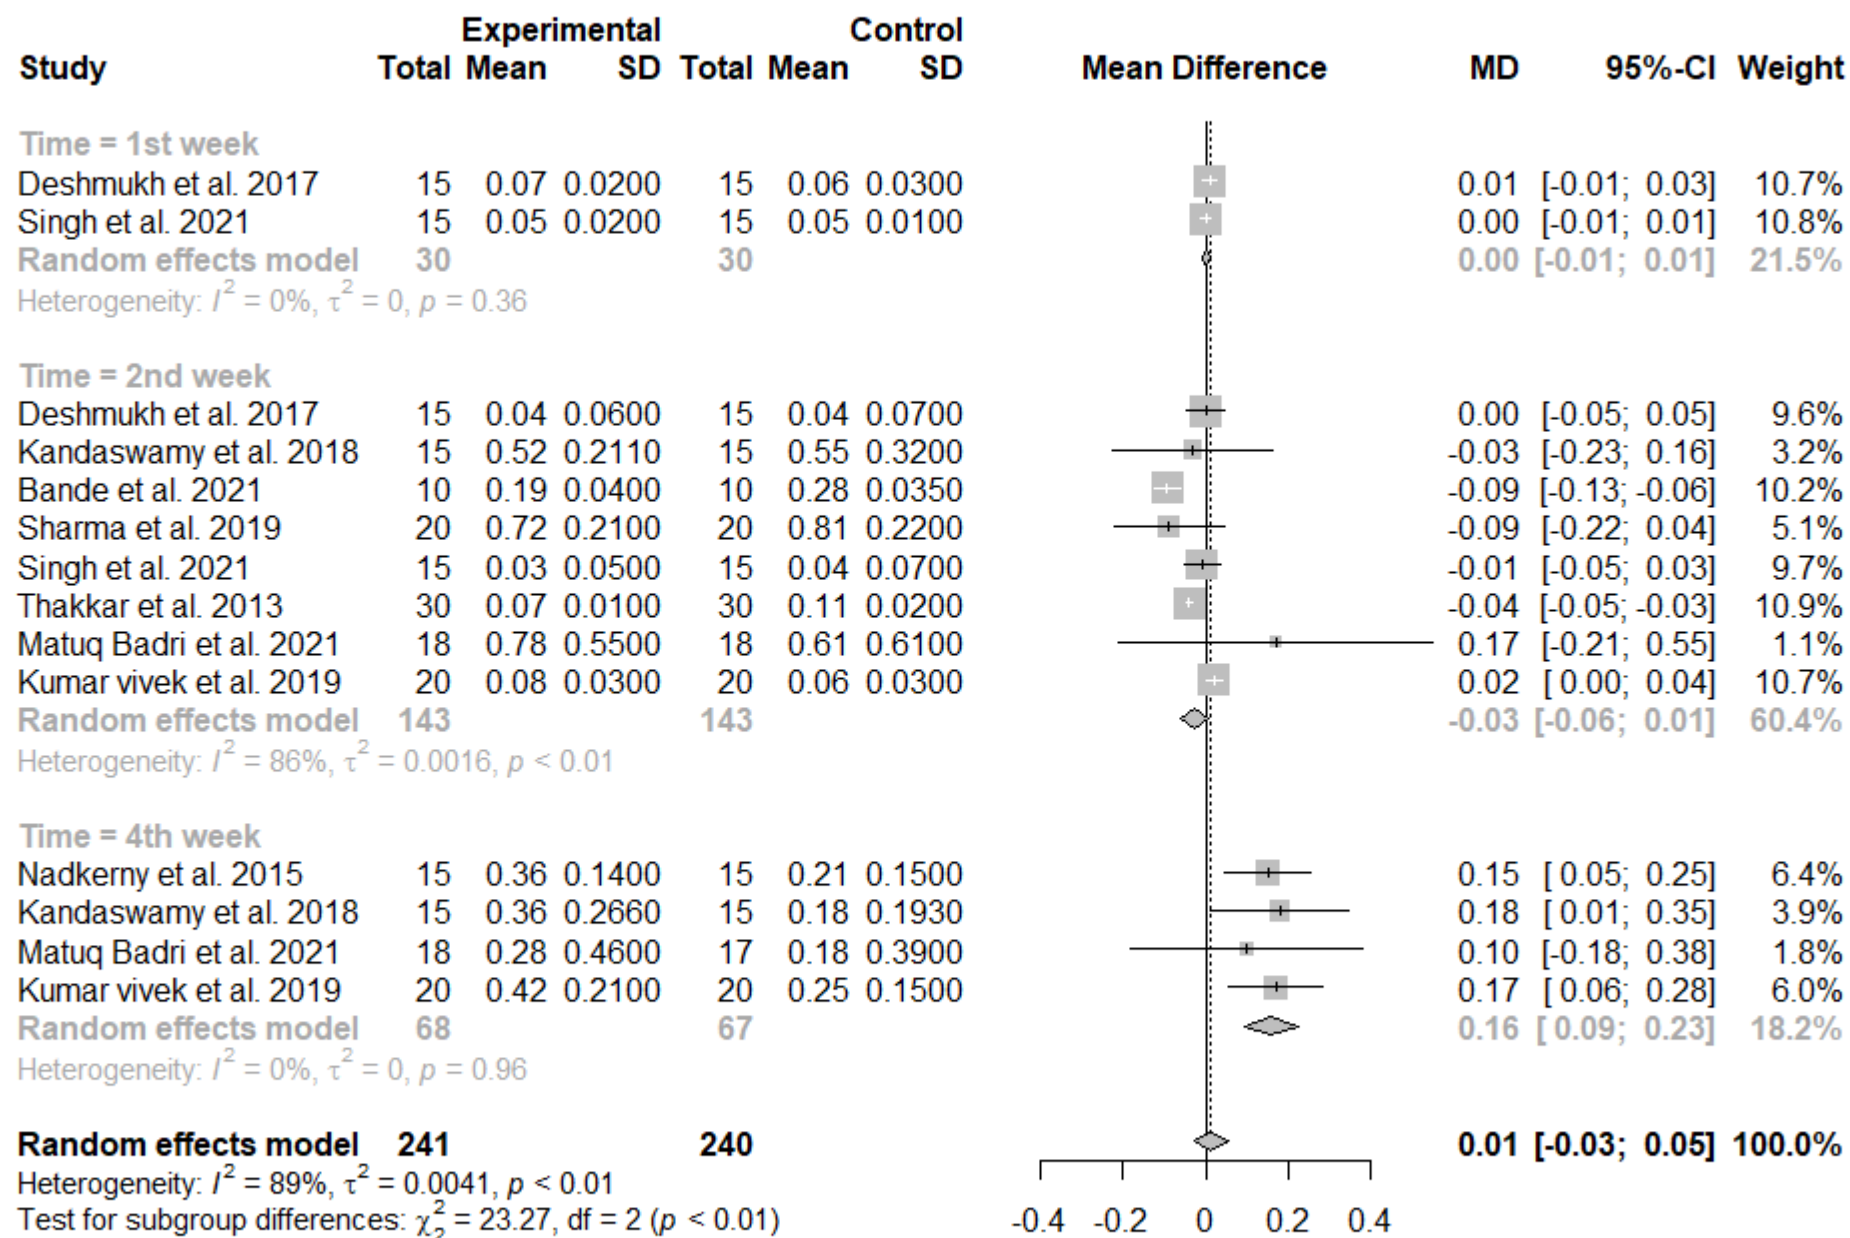

Supplement: f1 [file 4013004.f1.zip]

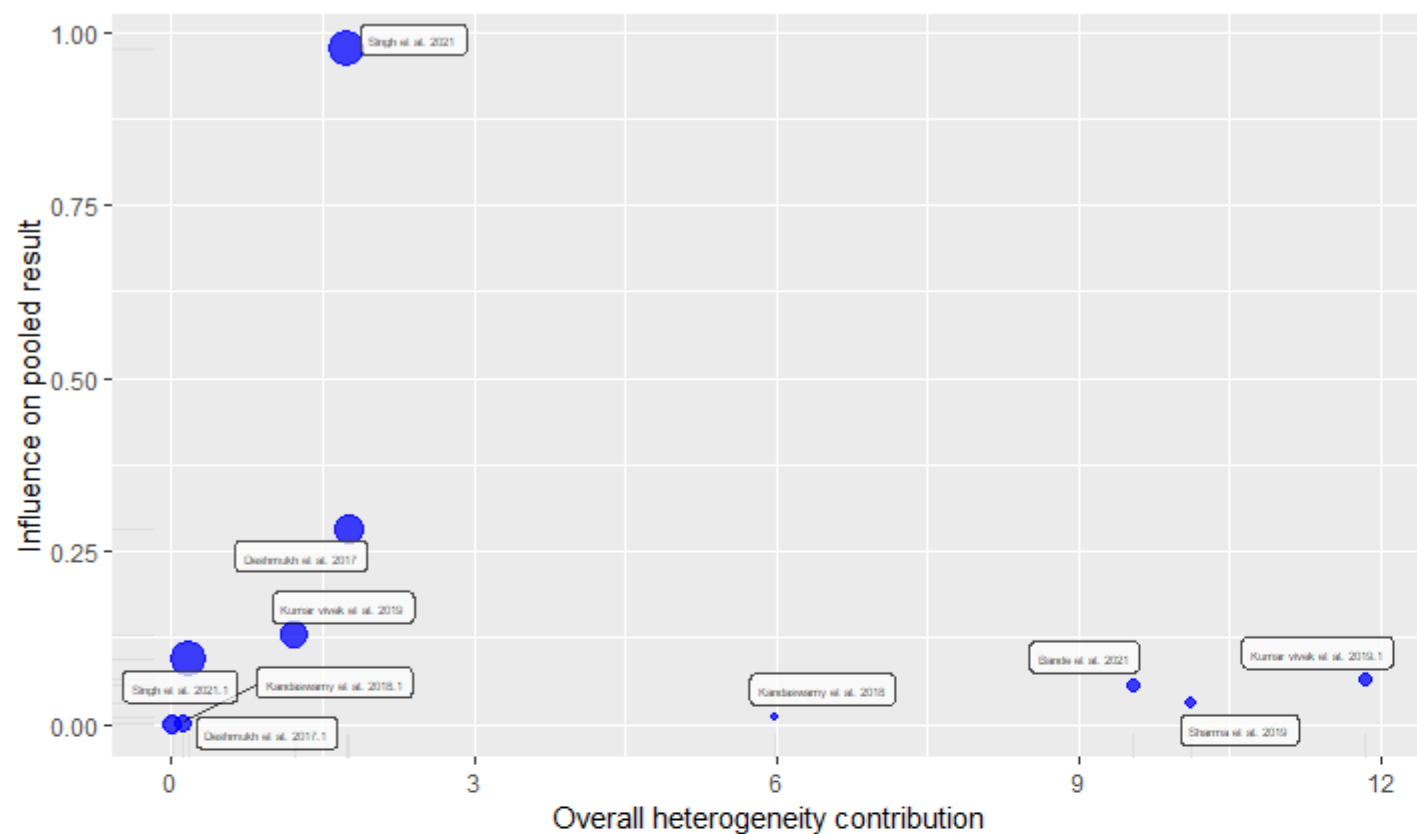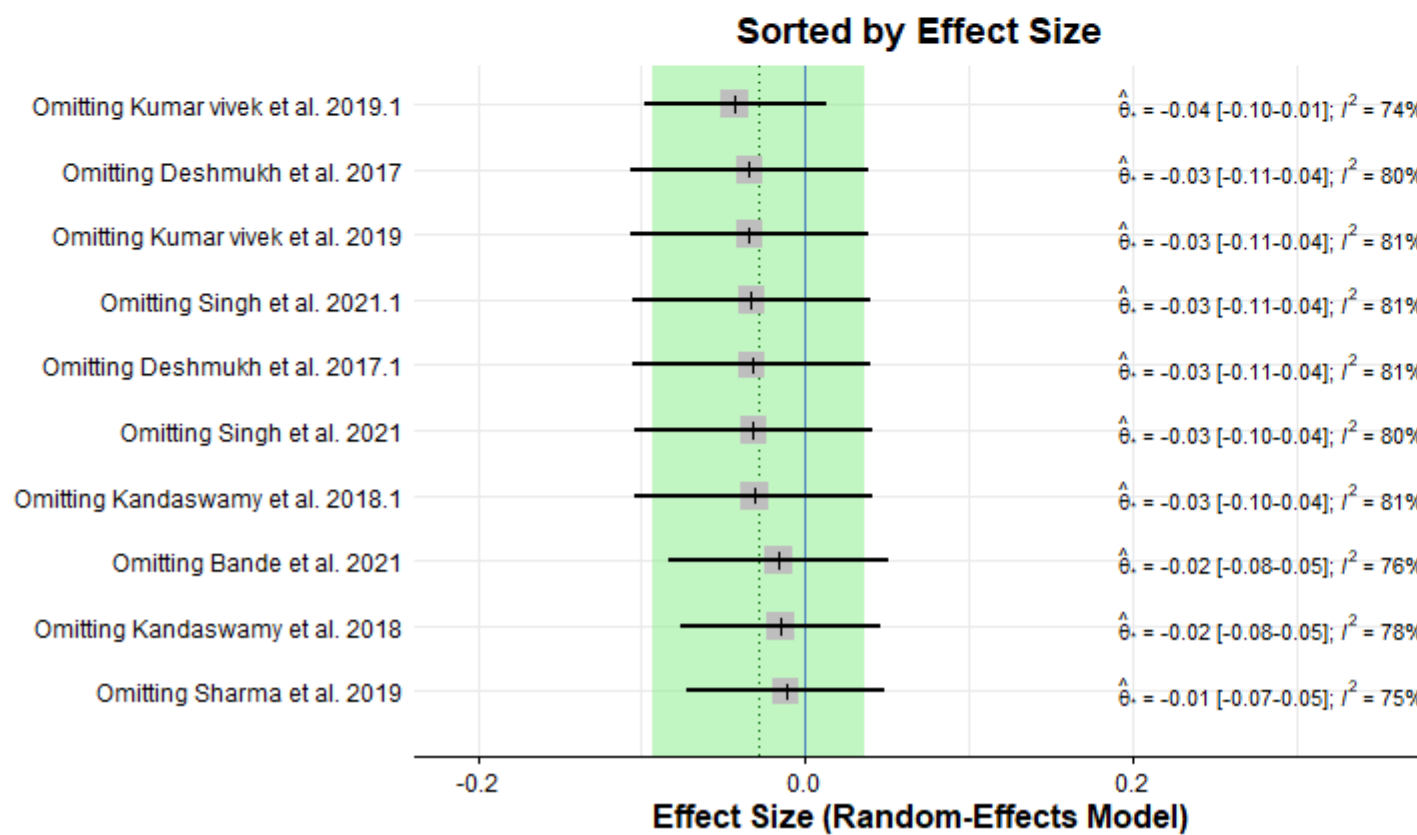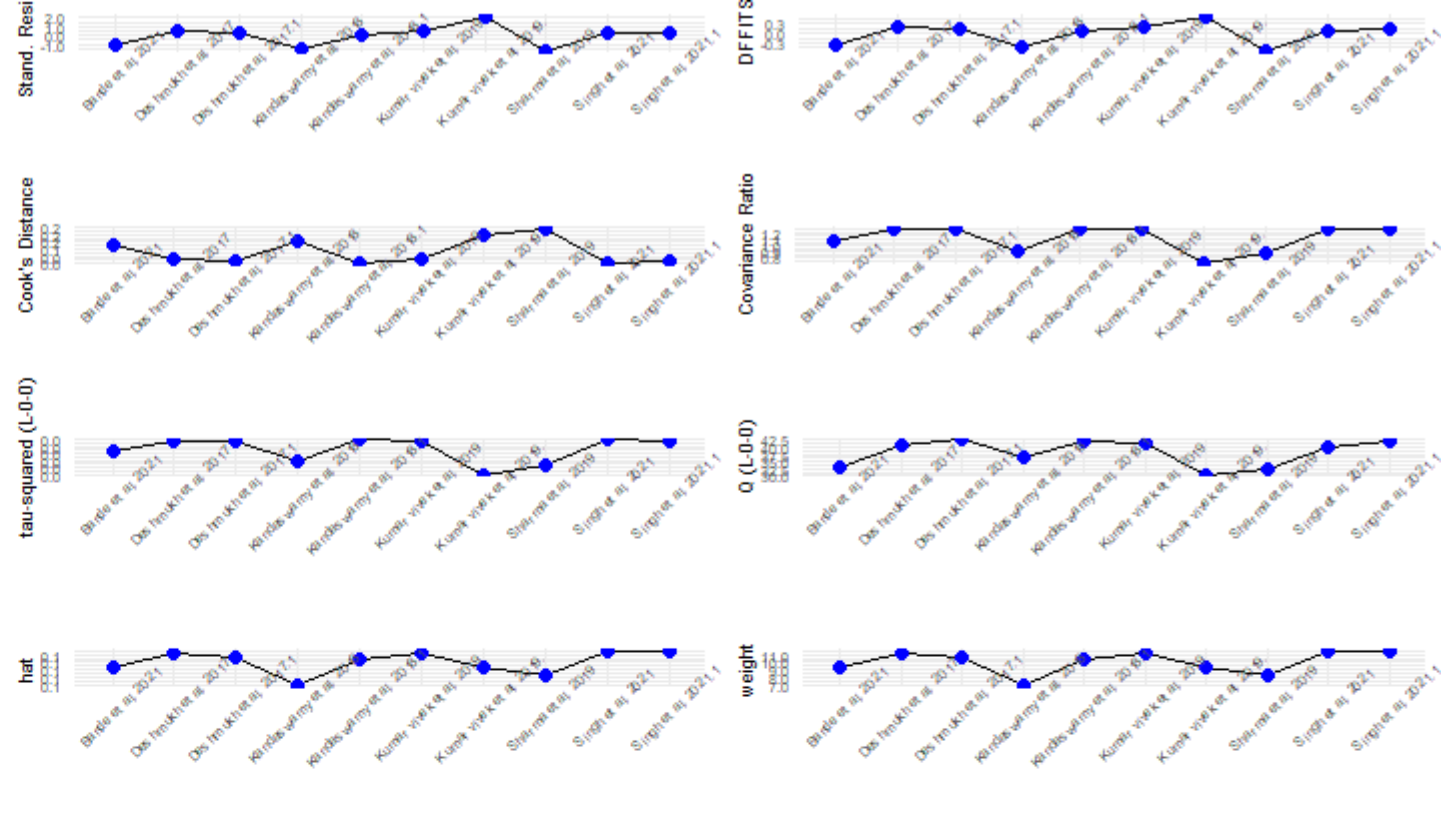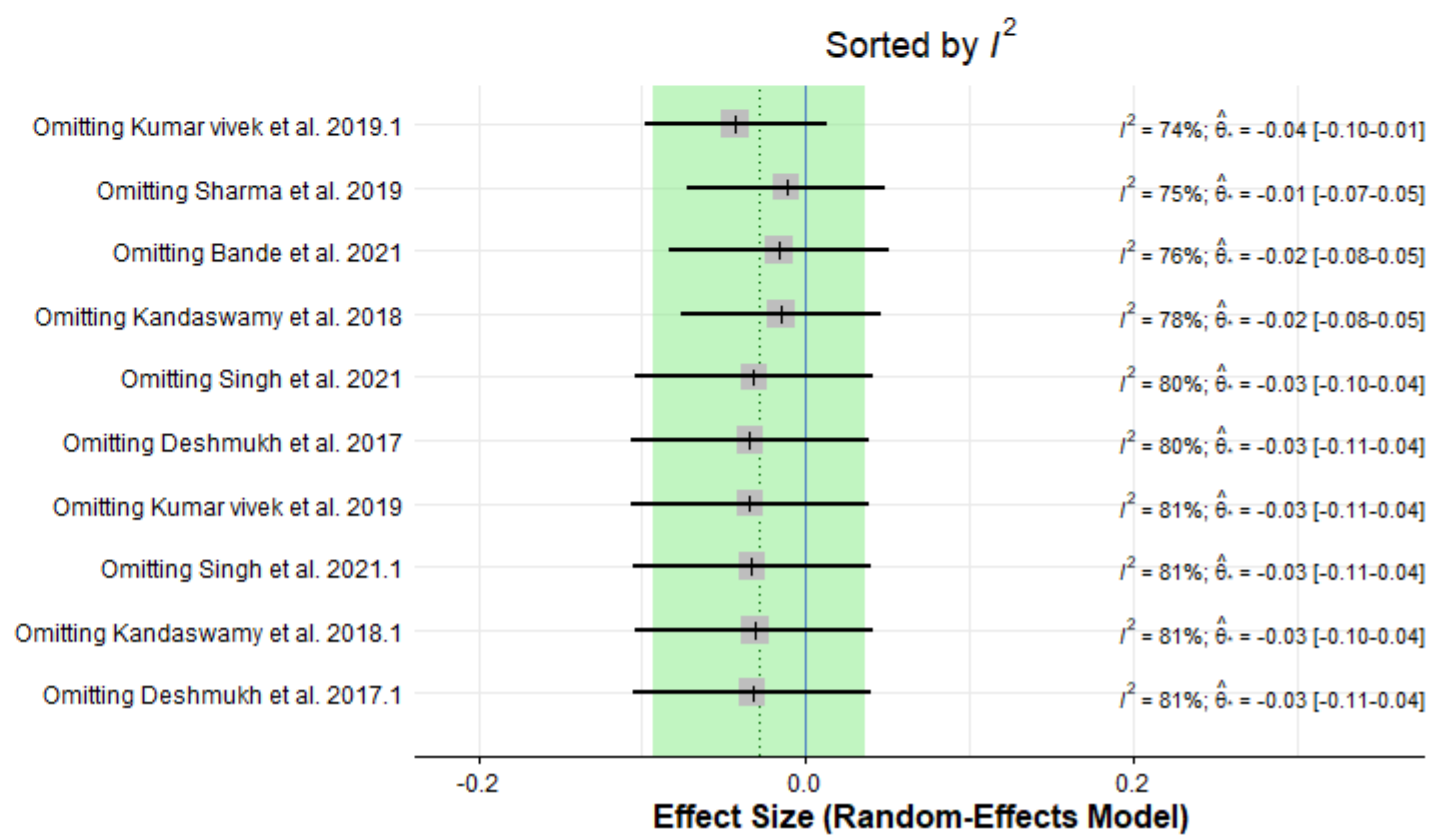

Supplement: f1 [file 4013004.f1.zip]

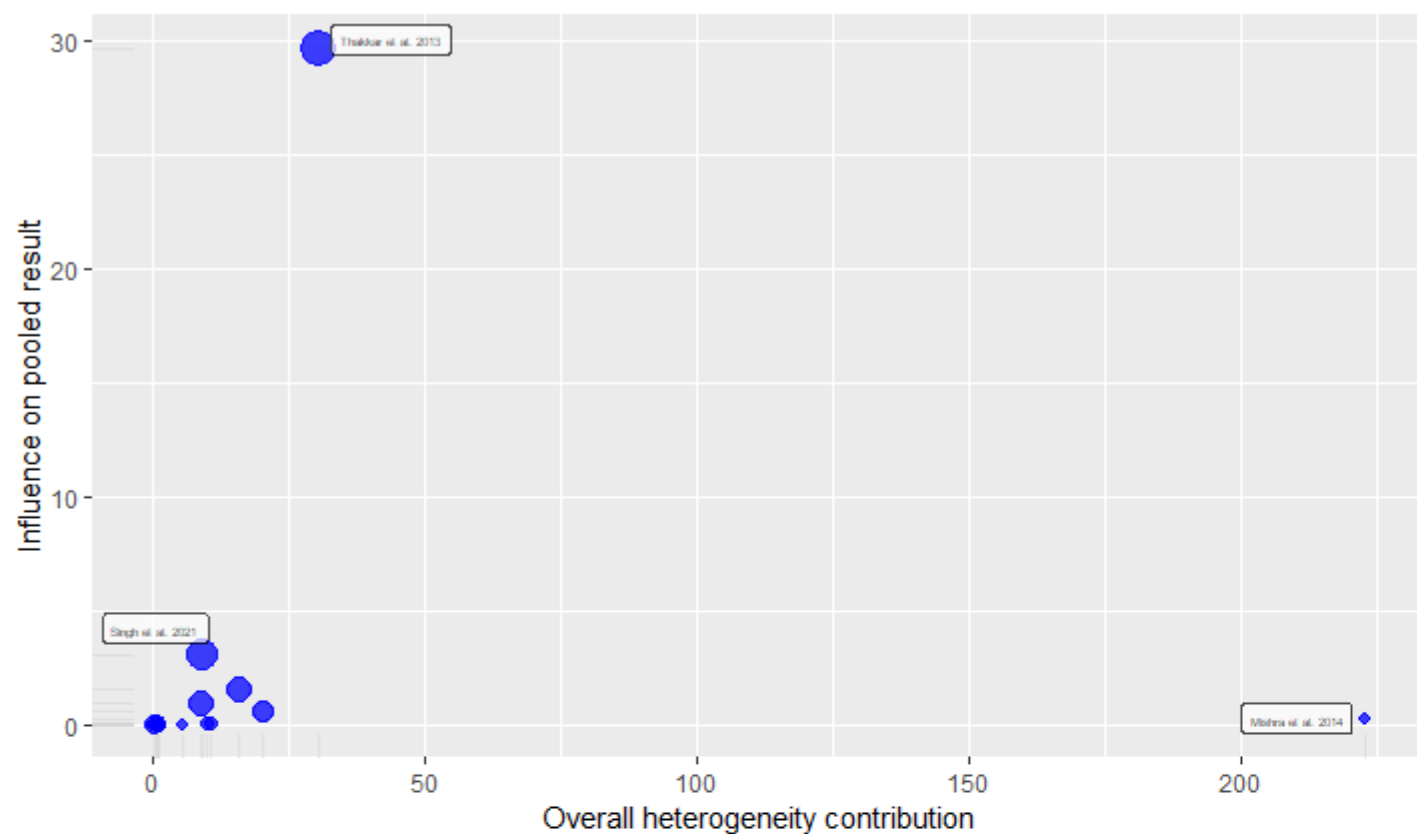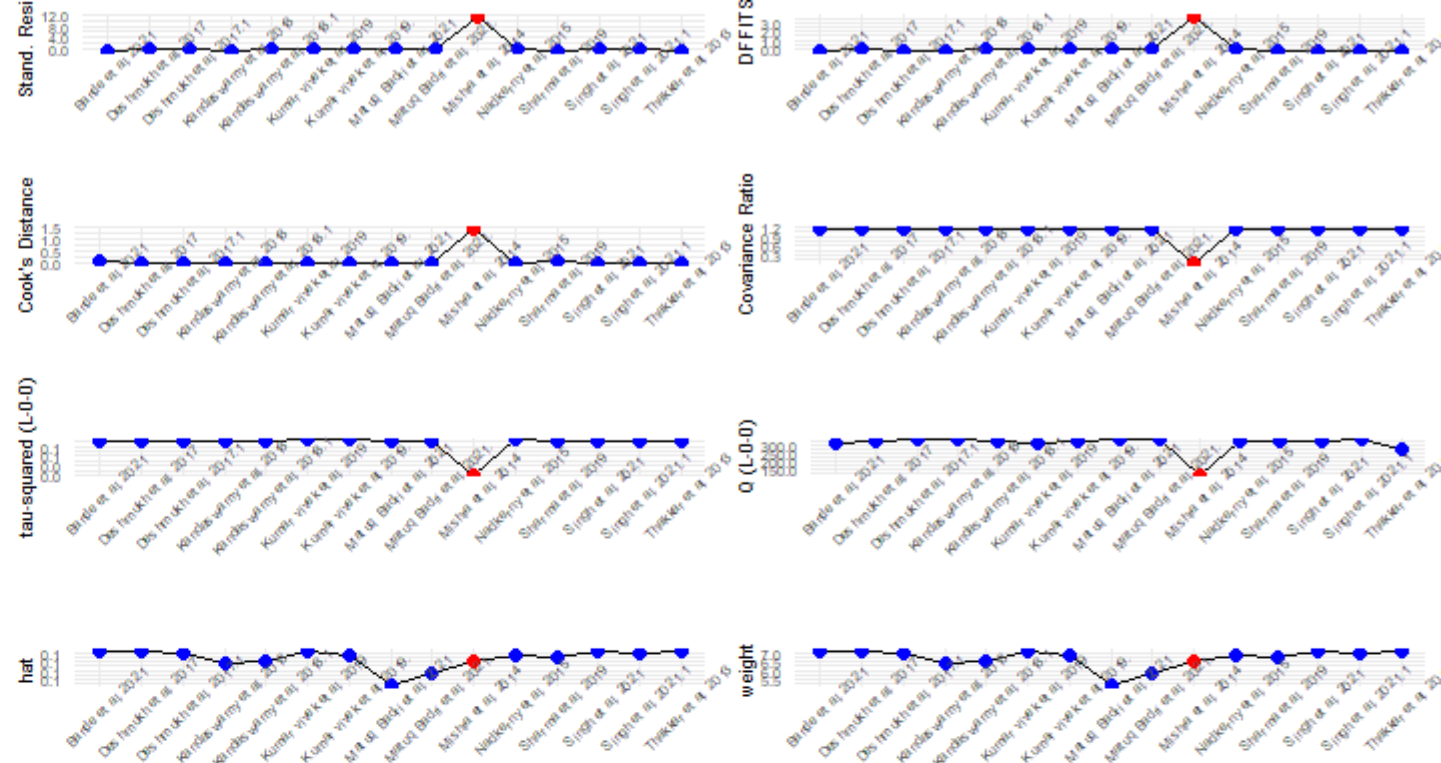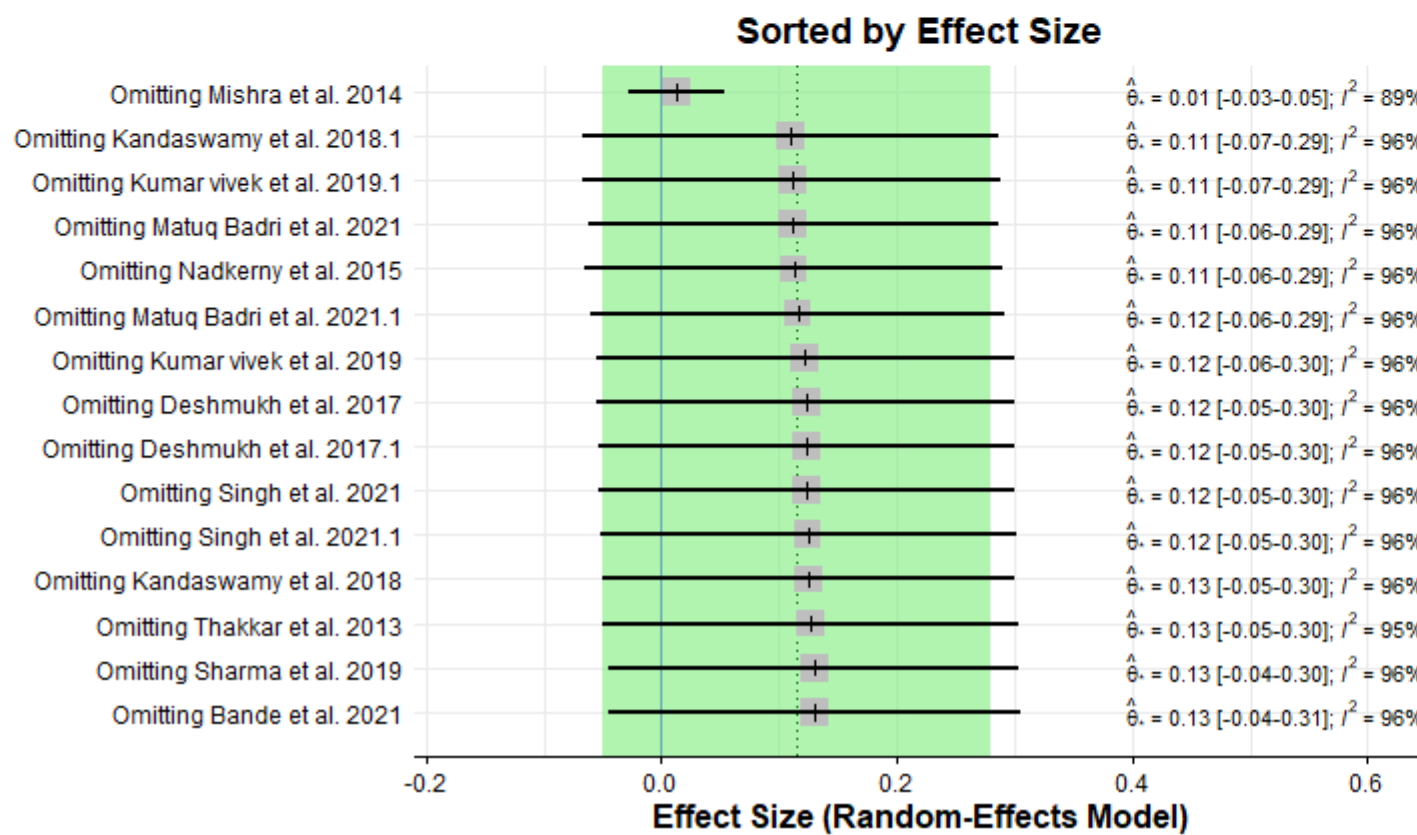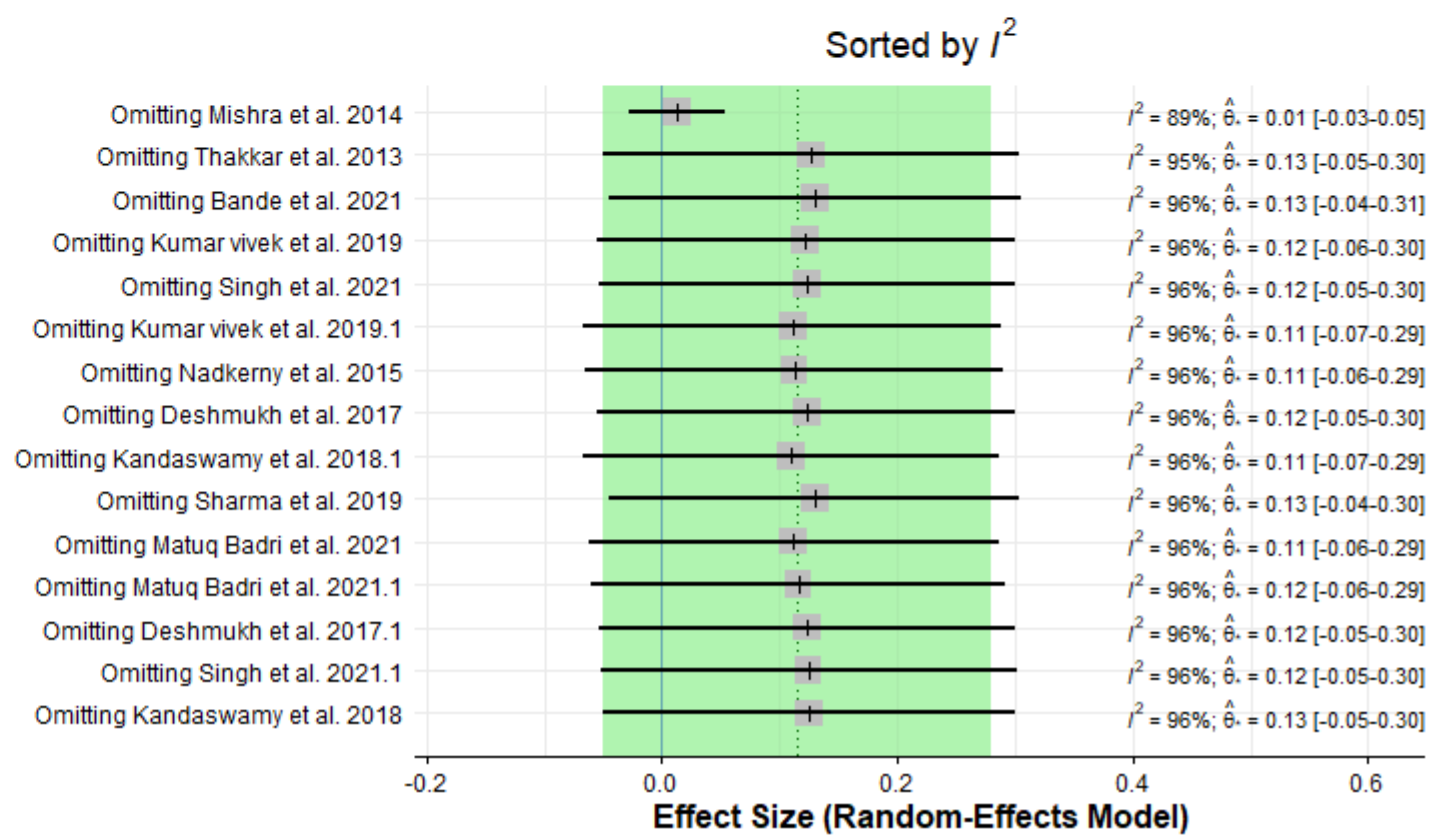

Supplement: f1 [file 4013004.f1.zip]

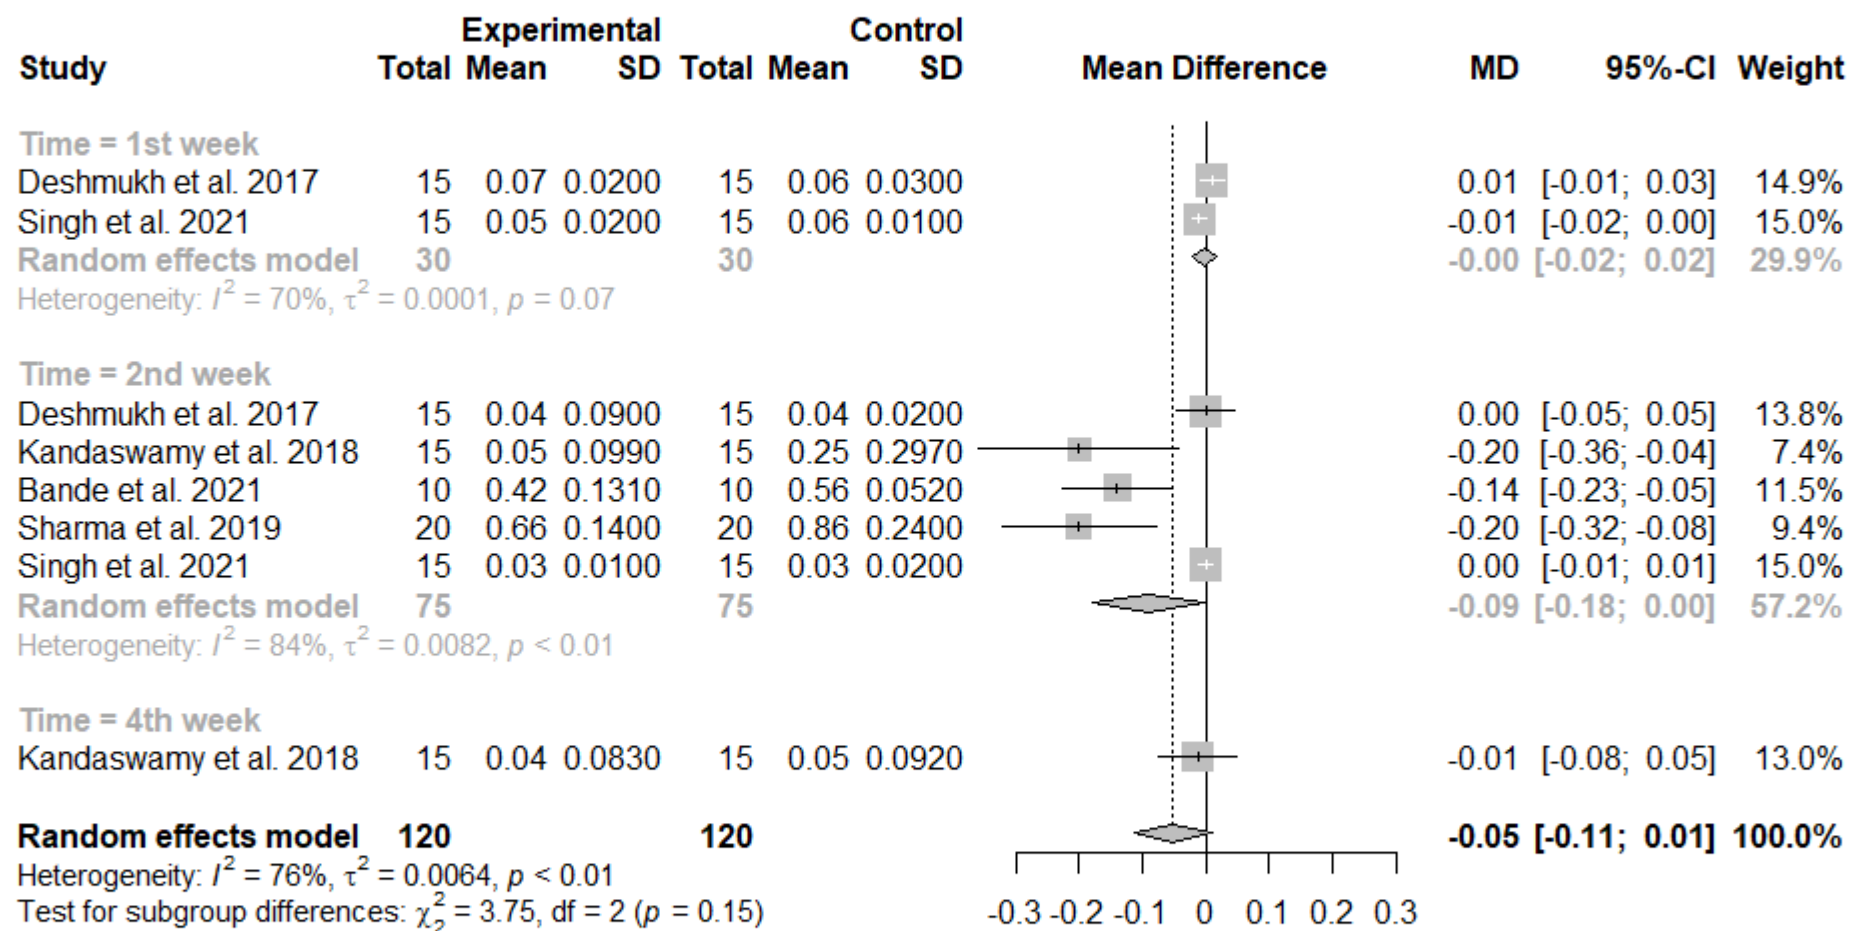

Supplement: f1 [file 4013004.f1.zip]
